# Supplementary material for: Sustainable production of dimethyl adipate by non-heme iron(iii) catalysed oxidative cleavage of catechol
Source: Royal Society of Chemistry journal article supplement (doi:10.1039/c4cy01562b), 2015-01-01
Supplement: c4cy01562b1.pdf [file c4cy01562b1.pdf]

Electronic Supporting Information for

## **Sustainable Production of Dimethyl Adipate by Non-Heme Iron(III) Catalysed Oxidative Cleavage of Catechol**

**Robin Jastrzebski, Emily J. van den Berg, Bert M. Weckhuysen and Pieter C.A. Bruijninx\***

*Inorganic Chemistry and Catalysis, Debye Institute for Nanomaterials Science, Utrecht University, Universiteitsweg 99, 3584 CG Utrecht, The Netherlands. E-Mail: p.c.a.bruijninx@uu.nl*

### **Contents**

|                                                               |    |
|---------------------------------------------------------------|----|
| S1 <sup>1</sup> H NMR spectrum of oxygenated products.....    | 2  |
| S2 <sup>1</sup> H NMR spectrum of hydrogenated products ..... | 3  |
| S3 Analytical data for dimethyl adipate.....                  | 4  |
| S4 <sup>1</sup> H NMR spectrum of distillation residue .....  | 7  |
| S5 UV-Visible spectrum of post-extraction aqueous layer.....  | 8  |
| S6 Absolute energies for calculated structures .....          | 9  |
| S7 Cartesian coordinates for calculated structures .....      | 10 |

# S1 <sup>1</sup>H NMR spectrum of oxygenated products

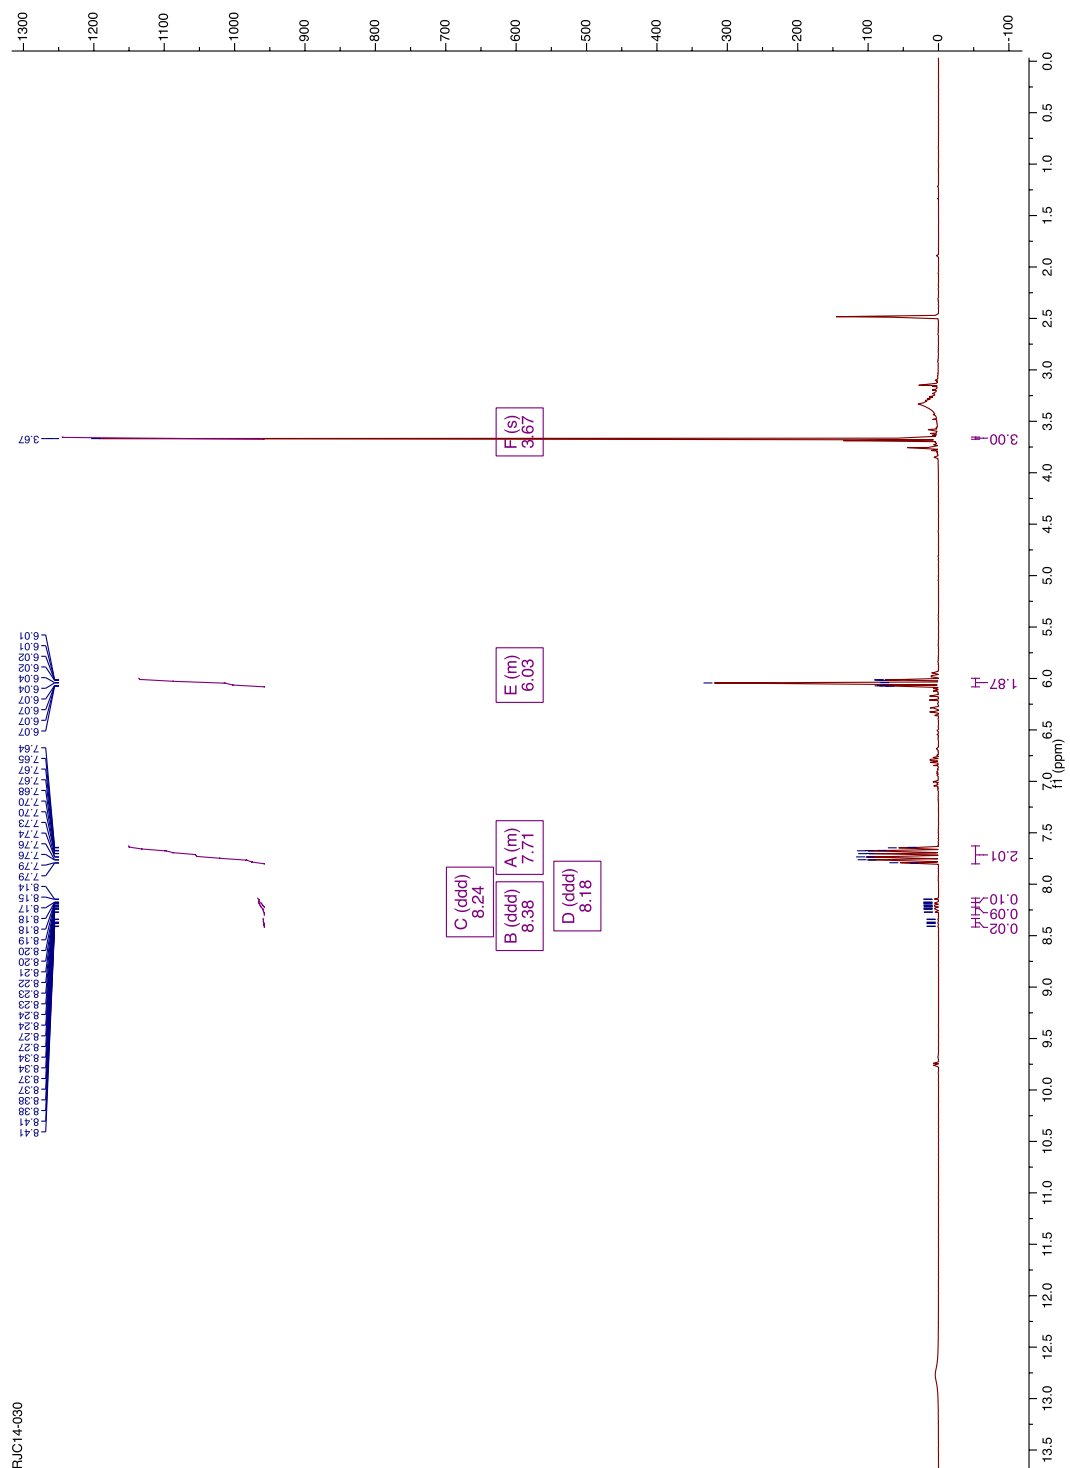

Figure S1: <sup>1</sup>H NMR spectrum of oxygenated products

## S2 $^1\text{H}$ NMR spectrum of hydrogenated products

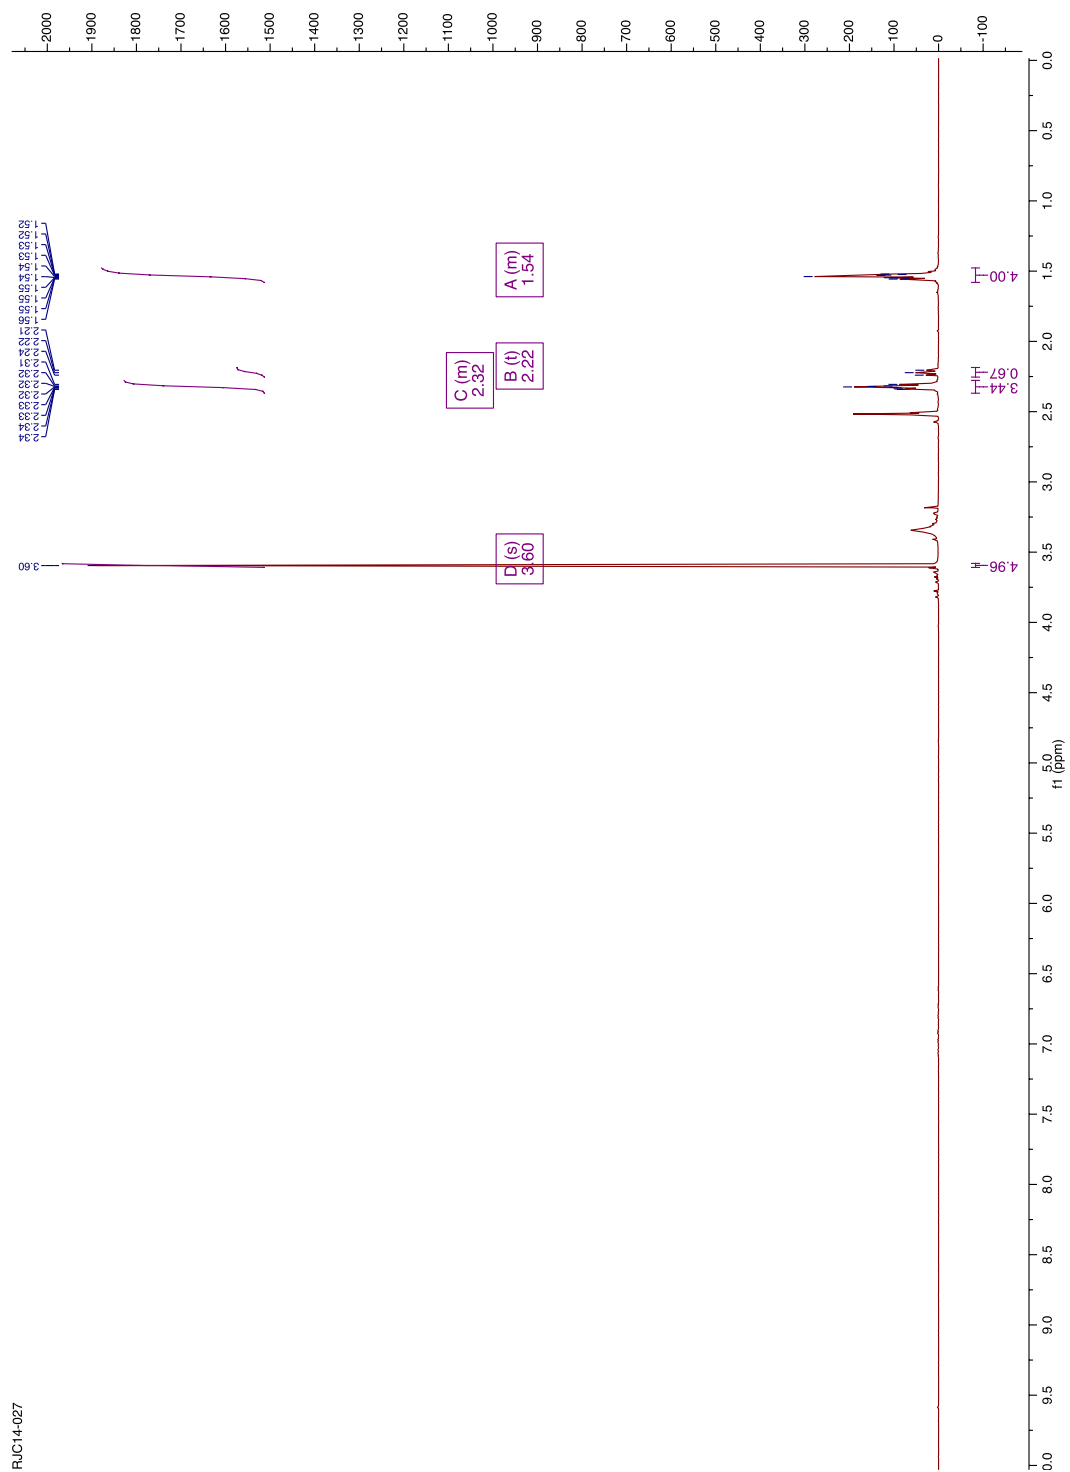

Figure S2:  $^1\text{H}$  NMR spectrum of hydrogenated products

### S3 Analytical data for dimethyl adipate

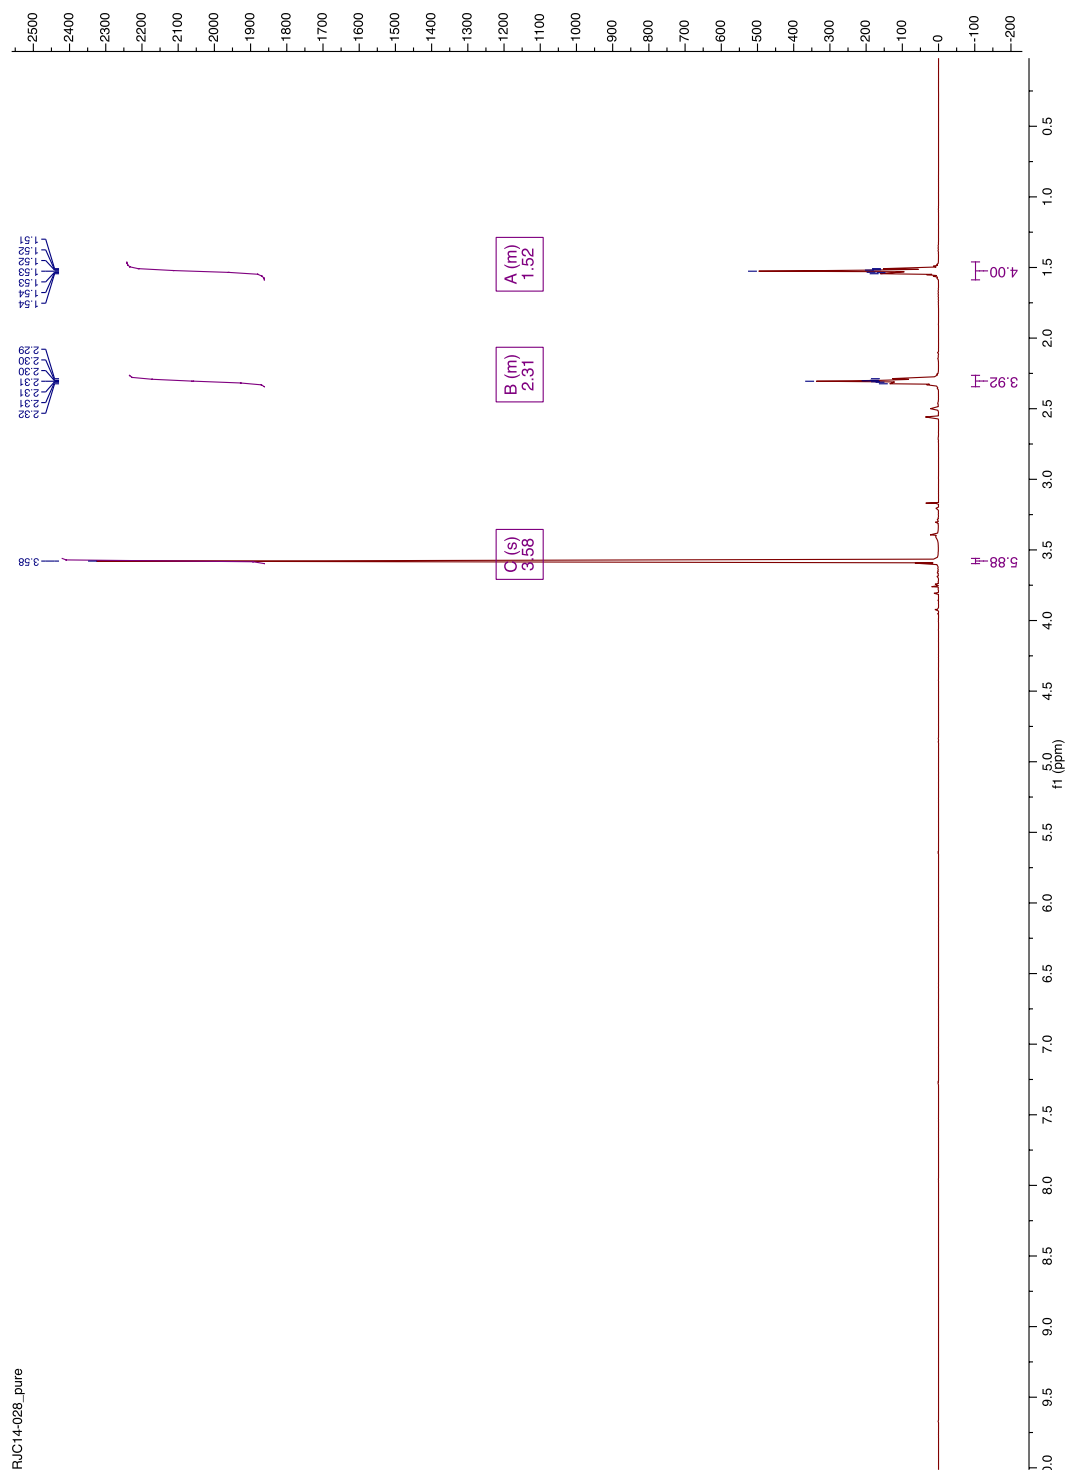

Figure S3:  $^1\text{H}$  NMR spectrum of dimethyl adipate after vacuum distillation

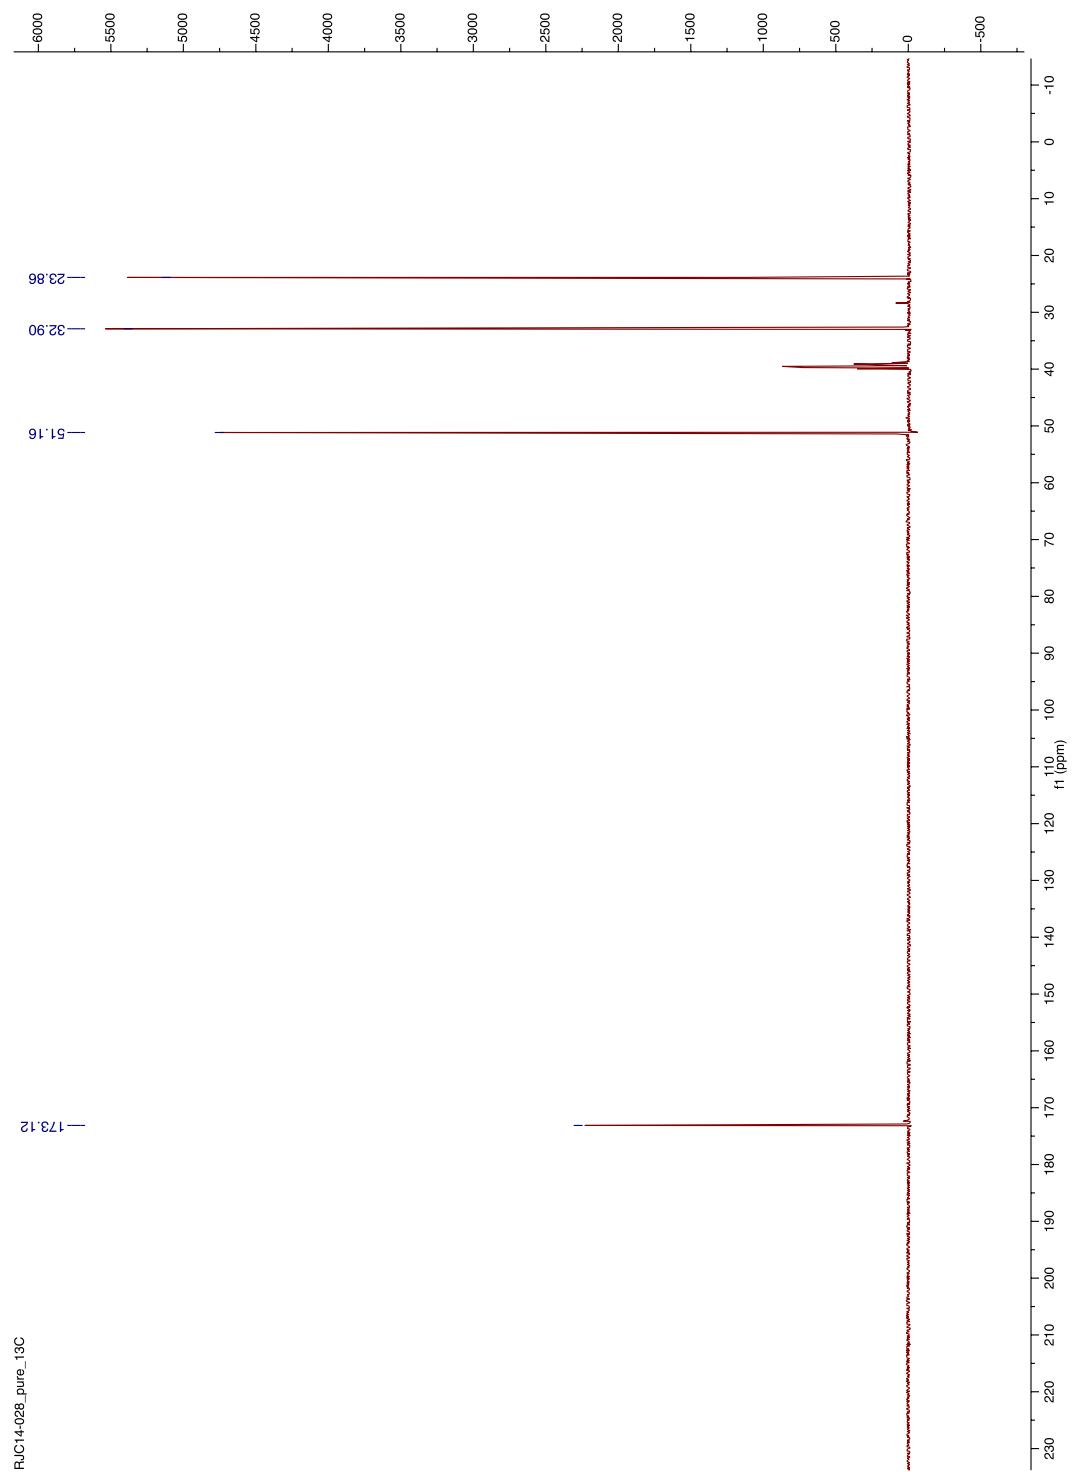

Figure S4:  $^{13}\text{C}$  NMR spectrum of dimethyl adipate after vacuum distillation

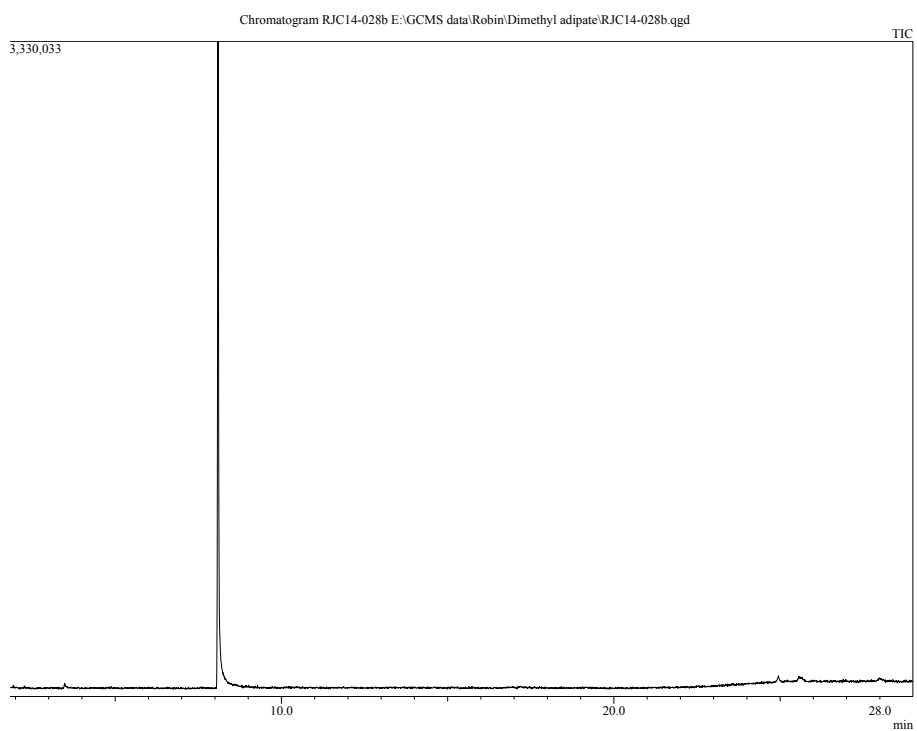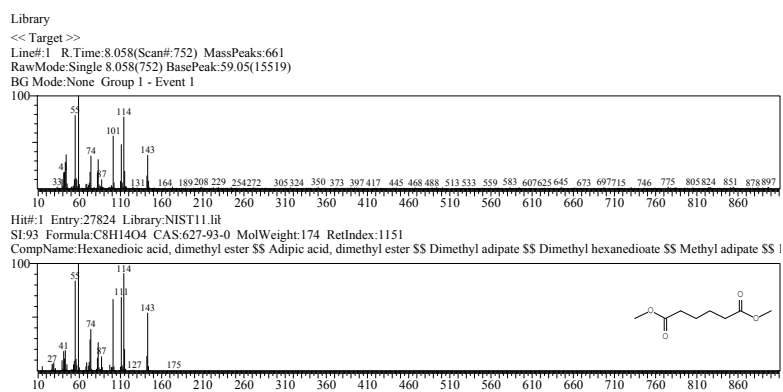

Figure S5: GC-MS chromatogram and mass spectrum of dimethyl adipate after vacuum distillation.

# S4 $^1\text{H}$ NMR spectrum of distillation residue

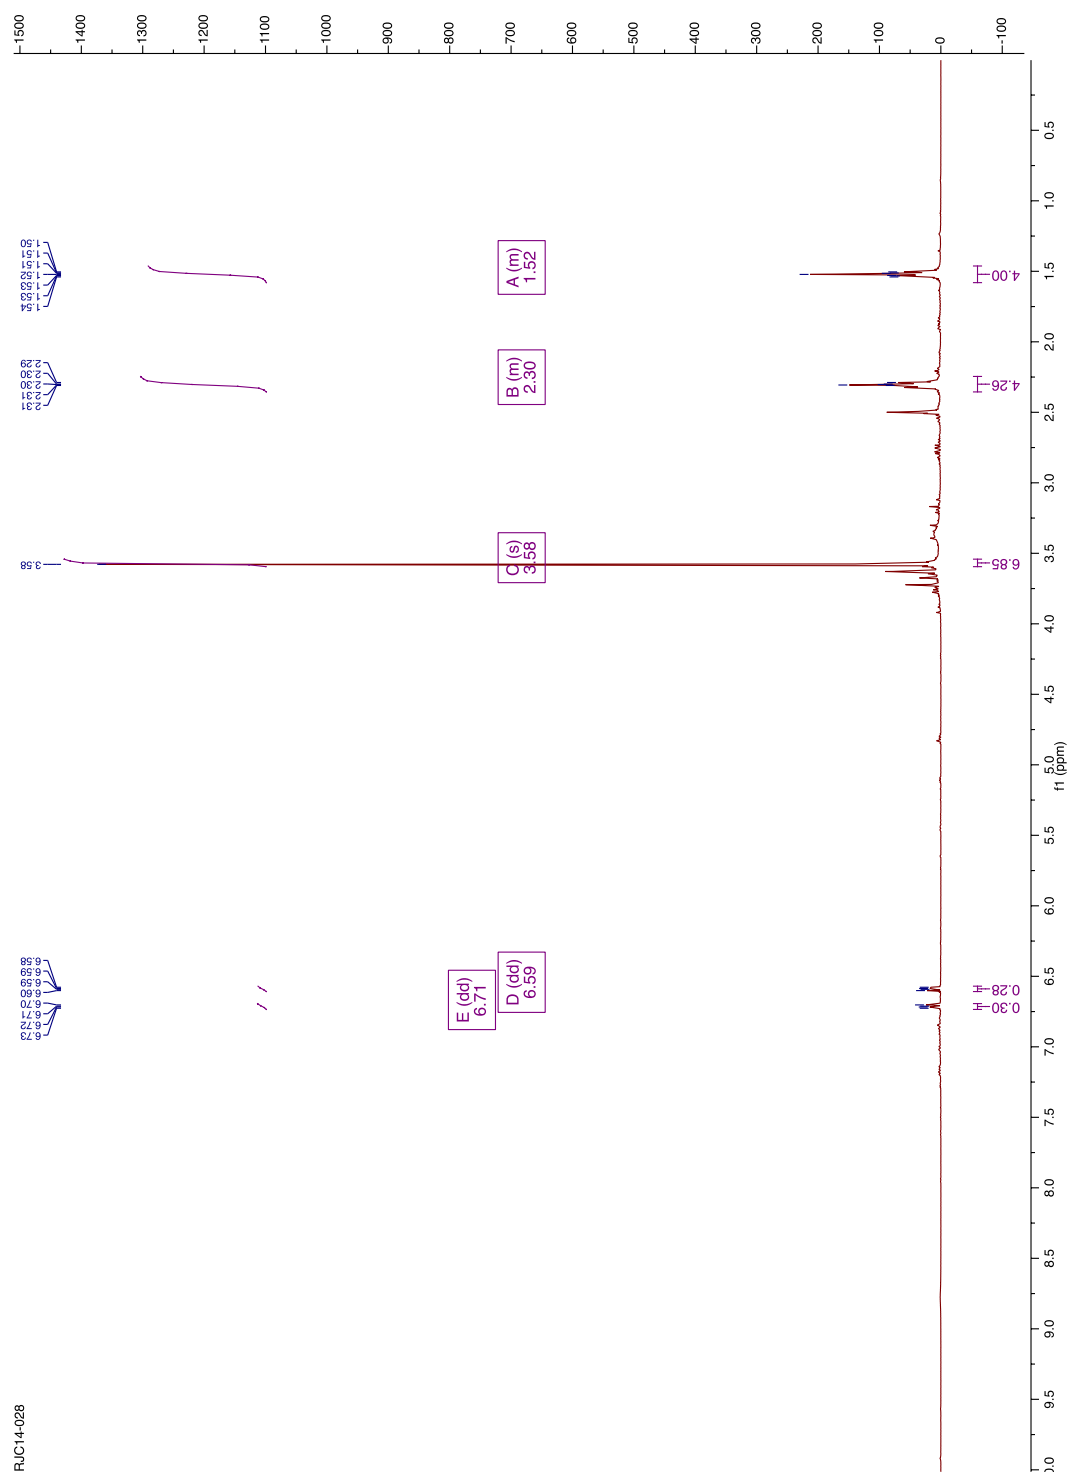

Figure S6:  $^1\text{H}$  NMR spectrum of the vacuum distillation residue. The peaks at 1.52, 2.30 and 3.58 ppm are indicative of dimethyl adipate, whereas the peaks at 6.59 and 6.71 correspond to catechol.

## S5 UV-Visible spectrum of post-extraction aqueous layer

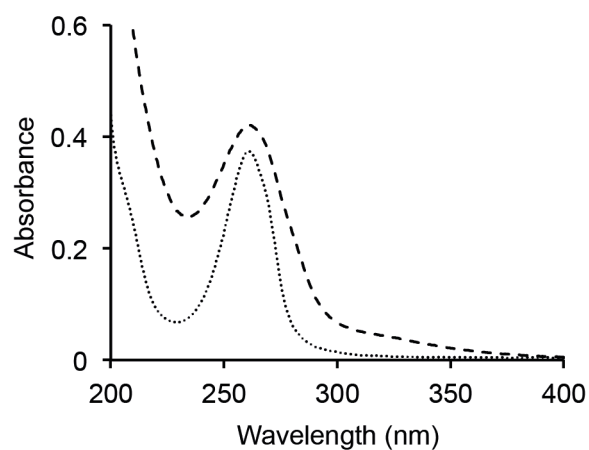

Figure S7. UV-Vis spectrum of TPA (dotted, 23.2  $\mu\text{M}$  in 4 mM HCl) and the aqueous phase after product extraction (dashed, 10x diluted). Subtracting the known absorbance of the TPA ligand in the aqueous phase at 264 nm, the residual muconate content of the aqueous phase must be < 1 % of the original catechol intake.



### S6 Absolute energies for calculated structures

|                                           | <i>cis,cis isomer</i> | <i>transition state</i> | <i>cis,trans isomer</i> |
|-------------------------------------------|-----------------------|-------------------------|-------------------------|
| Electronic energy (kcal/mol)              | -2729.1               | -2707.0                 | -2731.1                 |
| Internal energy (kcal/mol)                | 86.3                  | 85.0                    | 86.3                    |
| Entropy (cal/mol/K)                       | 110.3                 | 100.6                   | 111.4                   |
| Gibbs Free Energy <sup>1</sup> (kcal/mol) | -2675.6               | -2652.0                 | -2678.0                 |

<sup>1</sup> At 298 K

## S7 Cartesian coordinates for calculated structures

### *cis,cis isomer*

|   |              |              |              |
|---|--------------|--------------|--------------|
| C | 1.368498000  | -0.011499000 | 0.201812000  |
| C | 0.011830000  | -0.045717000 | 0.162801000  |
| C | -0.829698000 | 1.114199000  | -0.014441000 |
| C | -2.186842000 | 1.142535000  | -0.077227000 |
| H | 1.901071000  | -0.960573000 | 0.305802000  |
| H | -0.490464000 | -1.009605000 | 0.251049000  |
| H | -0.303345000 | 2.067146000  | -0.093776000 |
| H | -2.687285000 | 2.102783000  | -0.206510000 |
| C | 2.272111000  | 1.181722000  | 0.006473000  |
| O | 1.919835000  | 2.325930000  | 0.436632000  |
| O | 3.364452000  | 0.920181000  | -0.603228000 |
| C | -3.085008000 | -0.014257000 | 0.014020000  |
| O | -2.779994000 | -1.200586000 | 0.148983000  |
| O | -4.387159000 | 0.400579000  | -0.076200000 |
| C | -5.372760000 | -0.661895000 | -0.003340000 |
| H | -5.276218000 | -1.204624000 | 0.943547000  |
| H | -6.342369000 | -0.162399000 | -0.064128000 |
| H | -5.242980000 | -1.355773000 | -0.841592000 |

### *cis,trans isomer*

|   |              |              |              |
|---|--------------|--------------|--------------|
| C | 1.312563000  | 0.016992000  | -0.151227000 |
| C | -0.042707000 | 0.037222000  | -0.110822000 |
| C | -0.880008000 | 1.206064000  | 0.010077000  |
| C | -2.230616000 | 1.124462000  | 0.045547000  |
| H | 1.802965000  | -0.956958000 | -0.221924000 |
| H | -0.567138000 | -0.922676000 | -0.163442000 |
| H | -0.386543000 | 2.177088000  | 0.062751000  |
| H | -2.738448000 | 0.159668000  | -0.012089000 |
| C | 2.270355000  | 1.178300000  | -0.035773000 |
| O | 1.877080000  | 2.359997000  | -0.293640000 |
| O | 3.453128000  | 0.852547000  | 0.329975000  |
| C | -3.080031000 | 2.314285000  | 0.153623000  |
| O | -2.700171000 | 3.483661000  | 0.230460000  |
| O | -4.399558000 | 1.962826000  | 0.156274000  |
| C | -5.329583000 | 3.074136000  | 0.248889000  |
| H | -5.212435000 | 3.736429000  | -0.616153000 |
| H | -6.323238000 | 2.620537000  | 0.254781000  |
| H | -5.155493000 | 3.637020000  | 1.172436000  |

### *transition state*

|   |              |              |              |
|---|--------------|--------------|--------------|
| C | 1.223272000  | -0.265788000 | -0.700066000 |
| C | 0.177594000  | 0.077517000  | -1.467462000 |
| C | -0.391262000 | 1.384377000  | -1.009641000 |
| C | -1.814292000 | 1.292972000  | -0.542711000 |
| H | 1.834045000  | -1.163806000 | -0.742645000 |
| H | -0.272627000 | -0.471017000 | -2.289886000 |
| H | -0.193490000 | 2.171996000  | -1.763751000 |
| H | -2.075501000 | 1.813643000  | 0.377160000  |
| C | 1.426868000  | 0.779955000  | 0.306614000  |
| O | 0.473490000  | 1.751958000  | 0.133040000  |
| O | 2.268743000  | 0.866133000  | 1.201940000  |
| C | -2.792470000 | 0.697121000  | -1.319146000 |
| O | -2.686197000 | 0.138579000  | -2.456240000 |
| O | -4.085263000 | 0.758861000  | -0.710230000 |
| C | -5.128678000 | 0.118628000  | -1.460982000 |
| H | -4.929839000 | -0.953820000 | -1.595483000 |
| H | -6.041921000 | 0.250861000  | -0.869978000 |
| H | -5.258596000 | 0.580574000  | -2.449198000 |
